# Supplementary material for: Effects of Caffeine and 5-Caffeoylquinic Acid on Blood Cell In Vitro Cytokine Production in Response to Lipopolysaccharide Stimulation
Source: MDPI journal article supplement (doi:10.3390/app12147322), 2022-07-21
Supplement: s1 [file s1]

Archive with 1 entries (1 files):
- applsci-1794435-Supplementary.pdf
