# Supplementary material for: Effects of Caffeine and 5-Caffeoylquinic Acid on Blood Cell In Vitro Cytokine Production in Response to Lipopolysaccharide Stimulation
Source: MDPI journal article supplement (doi:10.3390/app12147322), 2022-07-21
Supplement: s1 [file s1 › applsci-1794435-Supplementary.pdf]

**Table S1.** Effects of caffeine on spontaneous cytokine production.

|                                                 | Caffeine concentrations ( $\mu\text{M}$ ) |                 |                 |                 |                 |                 | ANOVA          |
|-------------------------------------------------|-------------------------------------------|-----------------|-----------------|-----------------|-----------------|-----------------|----------------|
|                                                 | Control                                   | 5               | 10              | 15              | 30              | 50              | p ( $\eta^2$ ) |
| IL-10 ( $\text{pg}\cdot 10^{-6}$ cells)         | $1.98 \pm 1.05$                           | $2.24 \pm 0.74$ | $2.51 \pm 0.65$ | $2.21 \pm 0.57$ | $2.43 \pm 1.00$ | $2.27 \pm 0.65$ | 0.819 (0.104)  |
| IL-6 ( $\text{pg}\cdot 10^{-6}$ cells)          | $15.4 \pm 7.3$                            | $18.2 \pm 7.5$  | $19.8 \pm 4.2$  | $17.8 \pm 5.9$  | $19.1 \pm 7.9$  | $18.4 \pm 6.8$  | 0.845 (0.095)  |
| TNF- $\alpha$ ( $\text{pg}\cdot 10^{-6}$ cells) | $10.6 \pm 4.3$                            | $13.5 \pm 3.2$  | $15.6 \pm 6.6$  | $12.3 \pm 4.3$  | $14.6 \pm 6.8$  | $14.8 \pm 7.3$  | 0.864 (0.093)  |
| IL-12 ( $\text{pg}\cdot 10^{-6}$ cells)         | $37.8 \pm 17.6$                           | $47.7 \pm 27.4$ | $49.4 \pm 14.7$ | $46.4 \pm 22.7$ | $41.7 \pm 20.4$ | $48.5 \pm 9.0$  | 0.342 (0.039)  |
| IL-1 $\beta$ ( $\text{pg}\cdot 10^{-6}$ cells)  | n.d.                                      | n.d.            | n.d.            | n.d.            | n.d.            | n.d.            |                |

Values are expressed as means  $\pm$  SD. No significant differences were observed (ANOVA one-way test).  $\eta^2$  value is provided as a measure of effect size. n.d.: non-detected.

**Table S2.** Effects of 5-CQA on spontaneous cytokine production.

|                                                 | 5-CQA concentrations |                 |                 |                 |                 |                  | ANOVA          |
|-------------------------------------------------|----------------------|-----------------|-----------------|-----------------|-----------------|------------------|----------------|
|                                                 | Control              | 5 nM            | 20 nM           | 200 nM          | 2 $\mu\text{M}$ | 20 $\mu\text{M}$ | p ( $\eta^2$ ) |
| IL-10 ( $\text{pg}\cdot 10^{-6}$ cells)         | $1.64 \pm 0.64$      | $1.87 \pm 0.56$ | $2.04 \pm 0.42$ | $1.75 \pm 0.56$ | $2.02 \pm 0.85$ | $1.90 \pm 0.62$  | 0.567 (0.085)  |
| IL-6 ( $\text{pg}\cdot 10^{-6}$ cells)          | $12.0 \pm 4.3$       | $15.1 \pm 5.8$  | $16.2 \pm 3.3$  | $14.1 \pm 3.5$  | $15.8 \pm 6.3$  | $15.5 \pm 5.9$   | 0.580 (0.083)  |
| TNF- $\alpha$ ( $\text{pg}\cdot 10^{-6}$ cells) | $9.13 \pm 3.62$      | $11.8 \pm 4.1$  | $13.7 \pm 8.0$  | $9.29 \pm 4.84$ | $13.3 \pm 6.8$  | $11.9 \pm 3.6$   | 0.281 (0.134)  |
| IL-12 ( $\text{pg}\cdot 10^{-6}$ cells)         | $31.8 \pm 10.0$      | $37.0 \pm 19.5$ | $40.8 \pm 13.8$ | $36.3 \pm 14.5$ | $34.2 \pm 14.6$ | $42.8 \pm 15.1$  | 0.485 (0.098)  |
| IL-1 $\beta$ ( $\text{pg}\cdot 10^{-6}$ cells)  | n.d.                 | n.d.            | n.d.            | n.d.            | n.d.            | n.d.             |                |

Values are expressed as means  $\pm$  SD. No significant differences were observed (ANOVA one-way test).  $\eta^2$  value is provided as a measure of effect size. n.d.: non-detected.
